# Supplementary material for: A modular field system for near-surface, vertical profiling of the atmospheric composition in harsh environments using cavity ring-down spectroscopy
Source: Copernicus journal article supplement (doi:10.5194/amt-16-769-2023), 2023-02-09
Supplement: Supplementary file 1 [file amt-16-769-2023-supplement.zip]

Archive with 3 entries (3 files):
- Seidl_et_al_Supplement_5Jan.pdf
- Supplemental_files.zip
- amt-16-769-2023-supplement-title-page.pdf
