# Supplementary material for: A modular field system for near-surface, vertical profiling of the atmospheric composition in harsh environments using cavity ring-down spectroscopy
Source: Copernicus journal article supplement (doi:10.5194/amt-16-769-2023), 2023-02-09
Supplement: Supplementary file 1 [file amt-16-769-2023-supplement.zip › amt-16-769-2023-supplement-title-page.pdf]

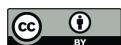

*Supplement of*

## **A modular field system for near-surface, vertical profiling of the atmospheric composition in harsh environments using cavity ring-down spectroscopy**

**Andrew W. Seidl et al.**

*Correspondence to:* Andrew W. Seidl ([andrew.seidl@uib.no](mailto:andrew.seidl@uib.no))

- [amt-16-769-2023-supplement-title-page.pdf](#)
- [Seidl\\_et\\_al\\_Supplement\\_5Jan.pdf](#)
- [Supplemental\\_files.zip](#)

The copyright of individual parts of the supplement might differ from the article licence.
