# Supplementary figures and images for: A modular field system for near-surface, vertical profiling of the atmospheric composition in harsh environments using cavity ring-down spectroscopy
Source: Copernicus journal article supplement (doi:10.5194/amt-16-769-2023), 2023-02-09

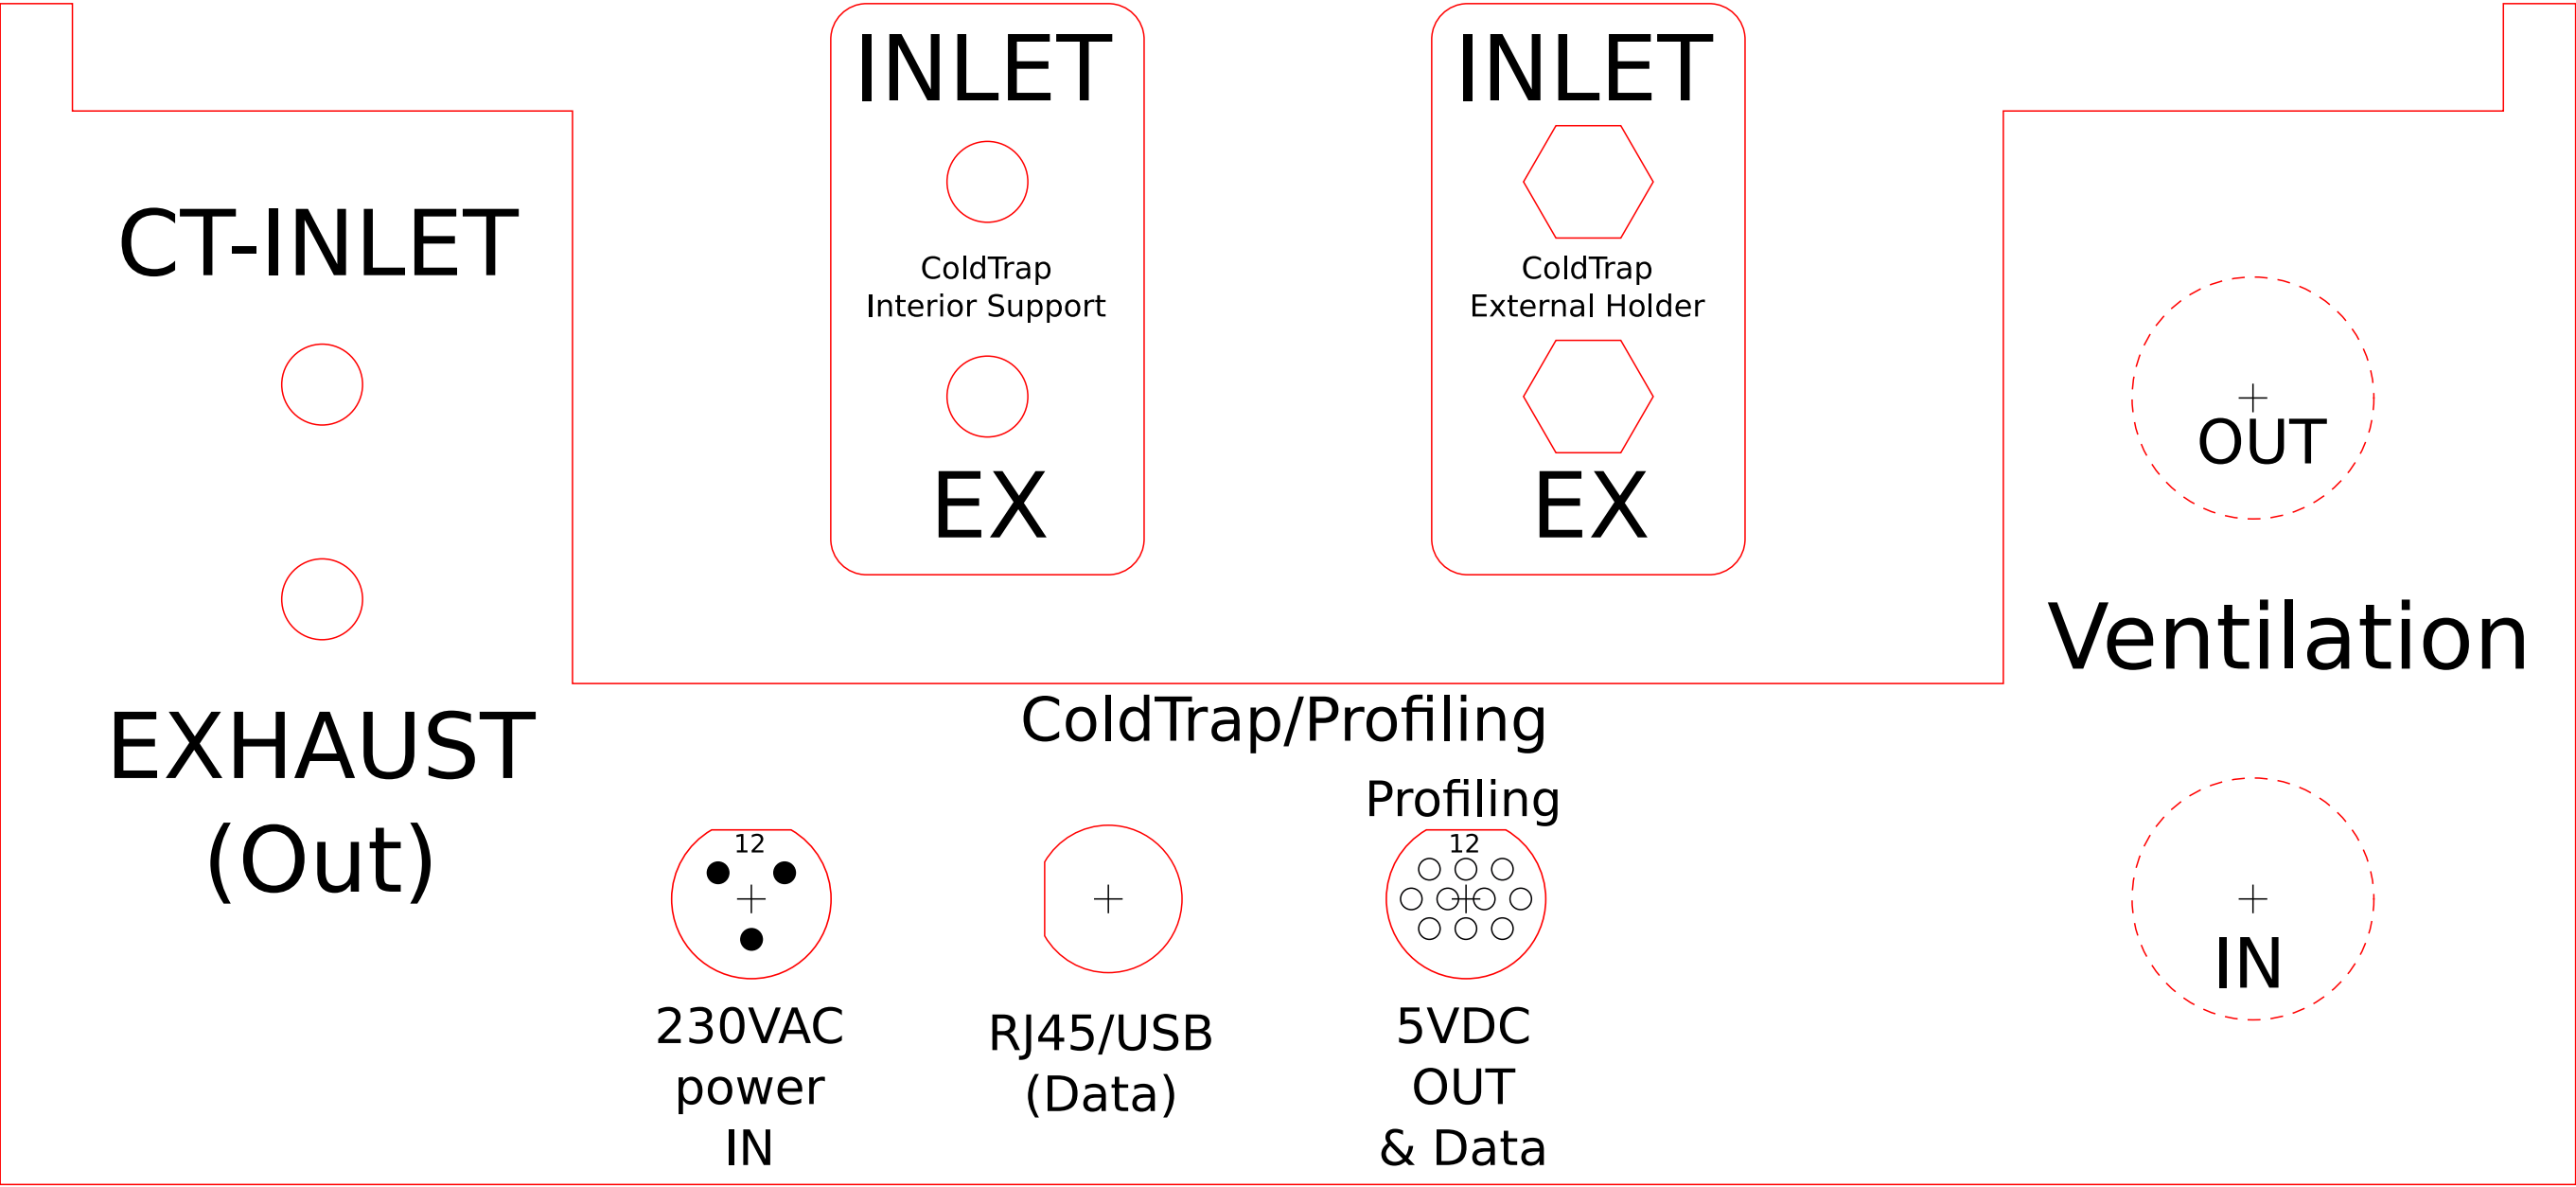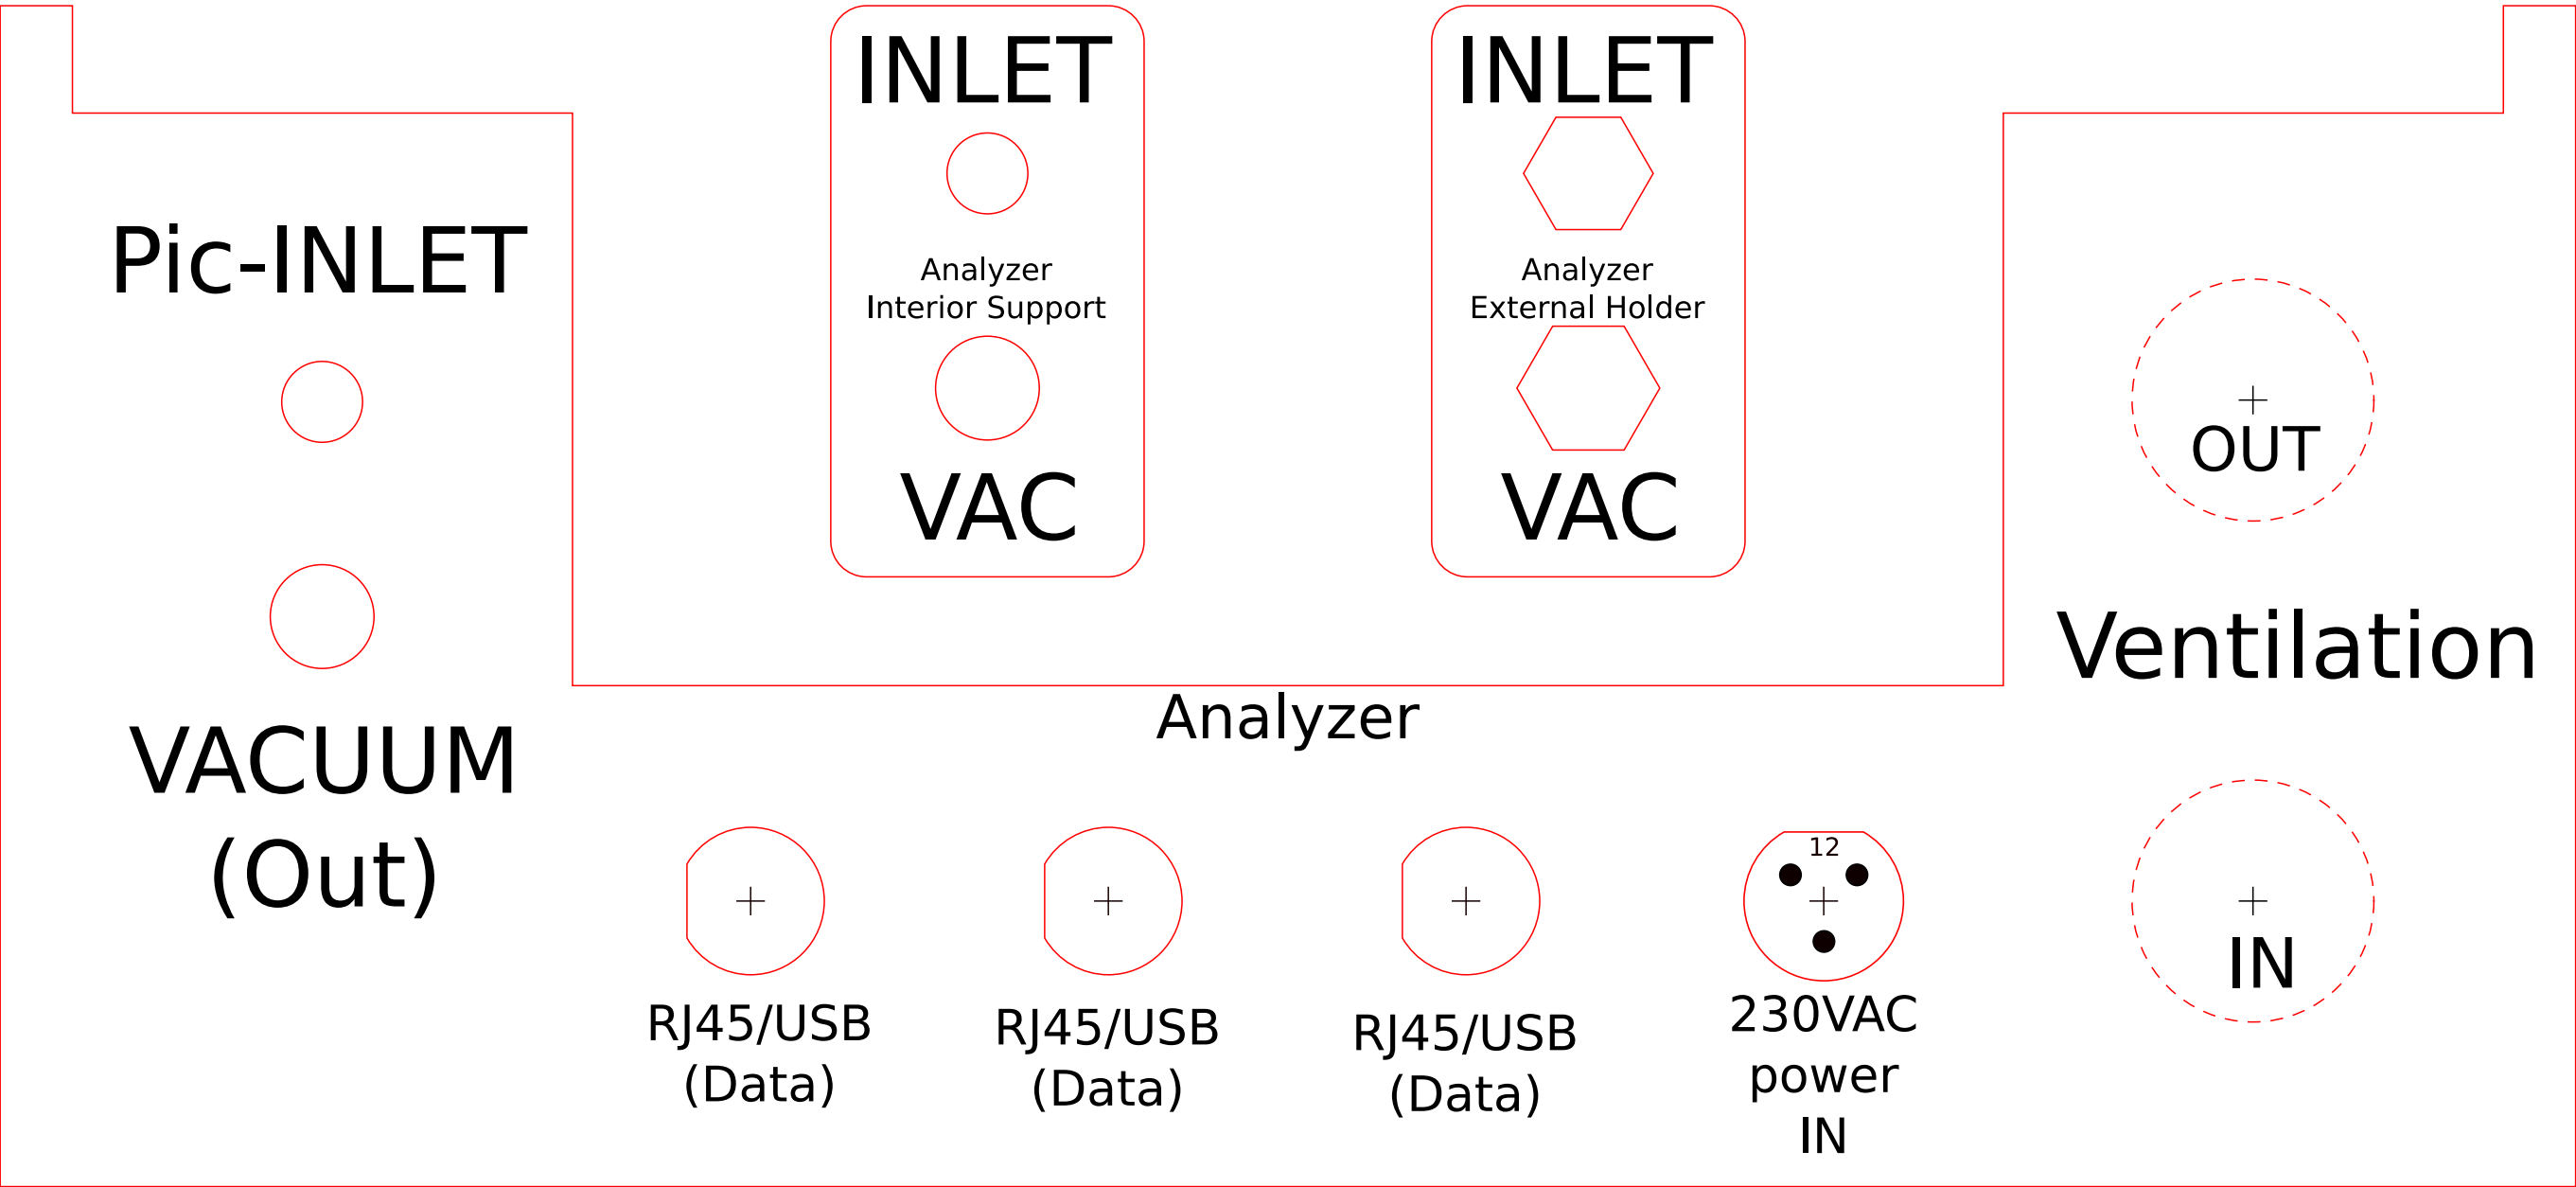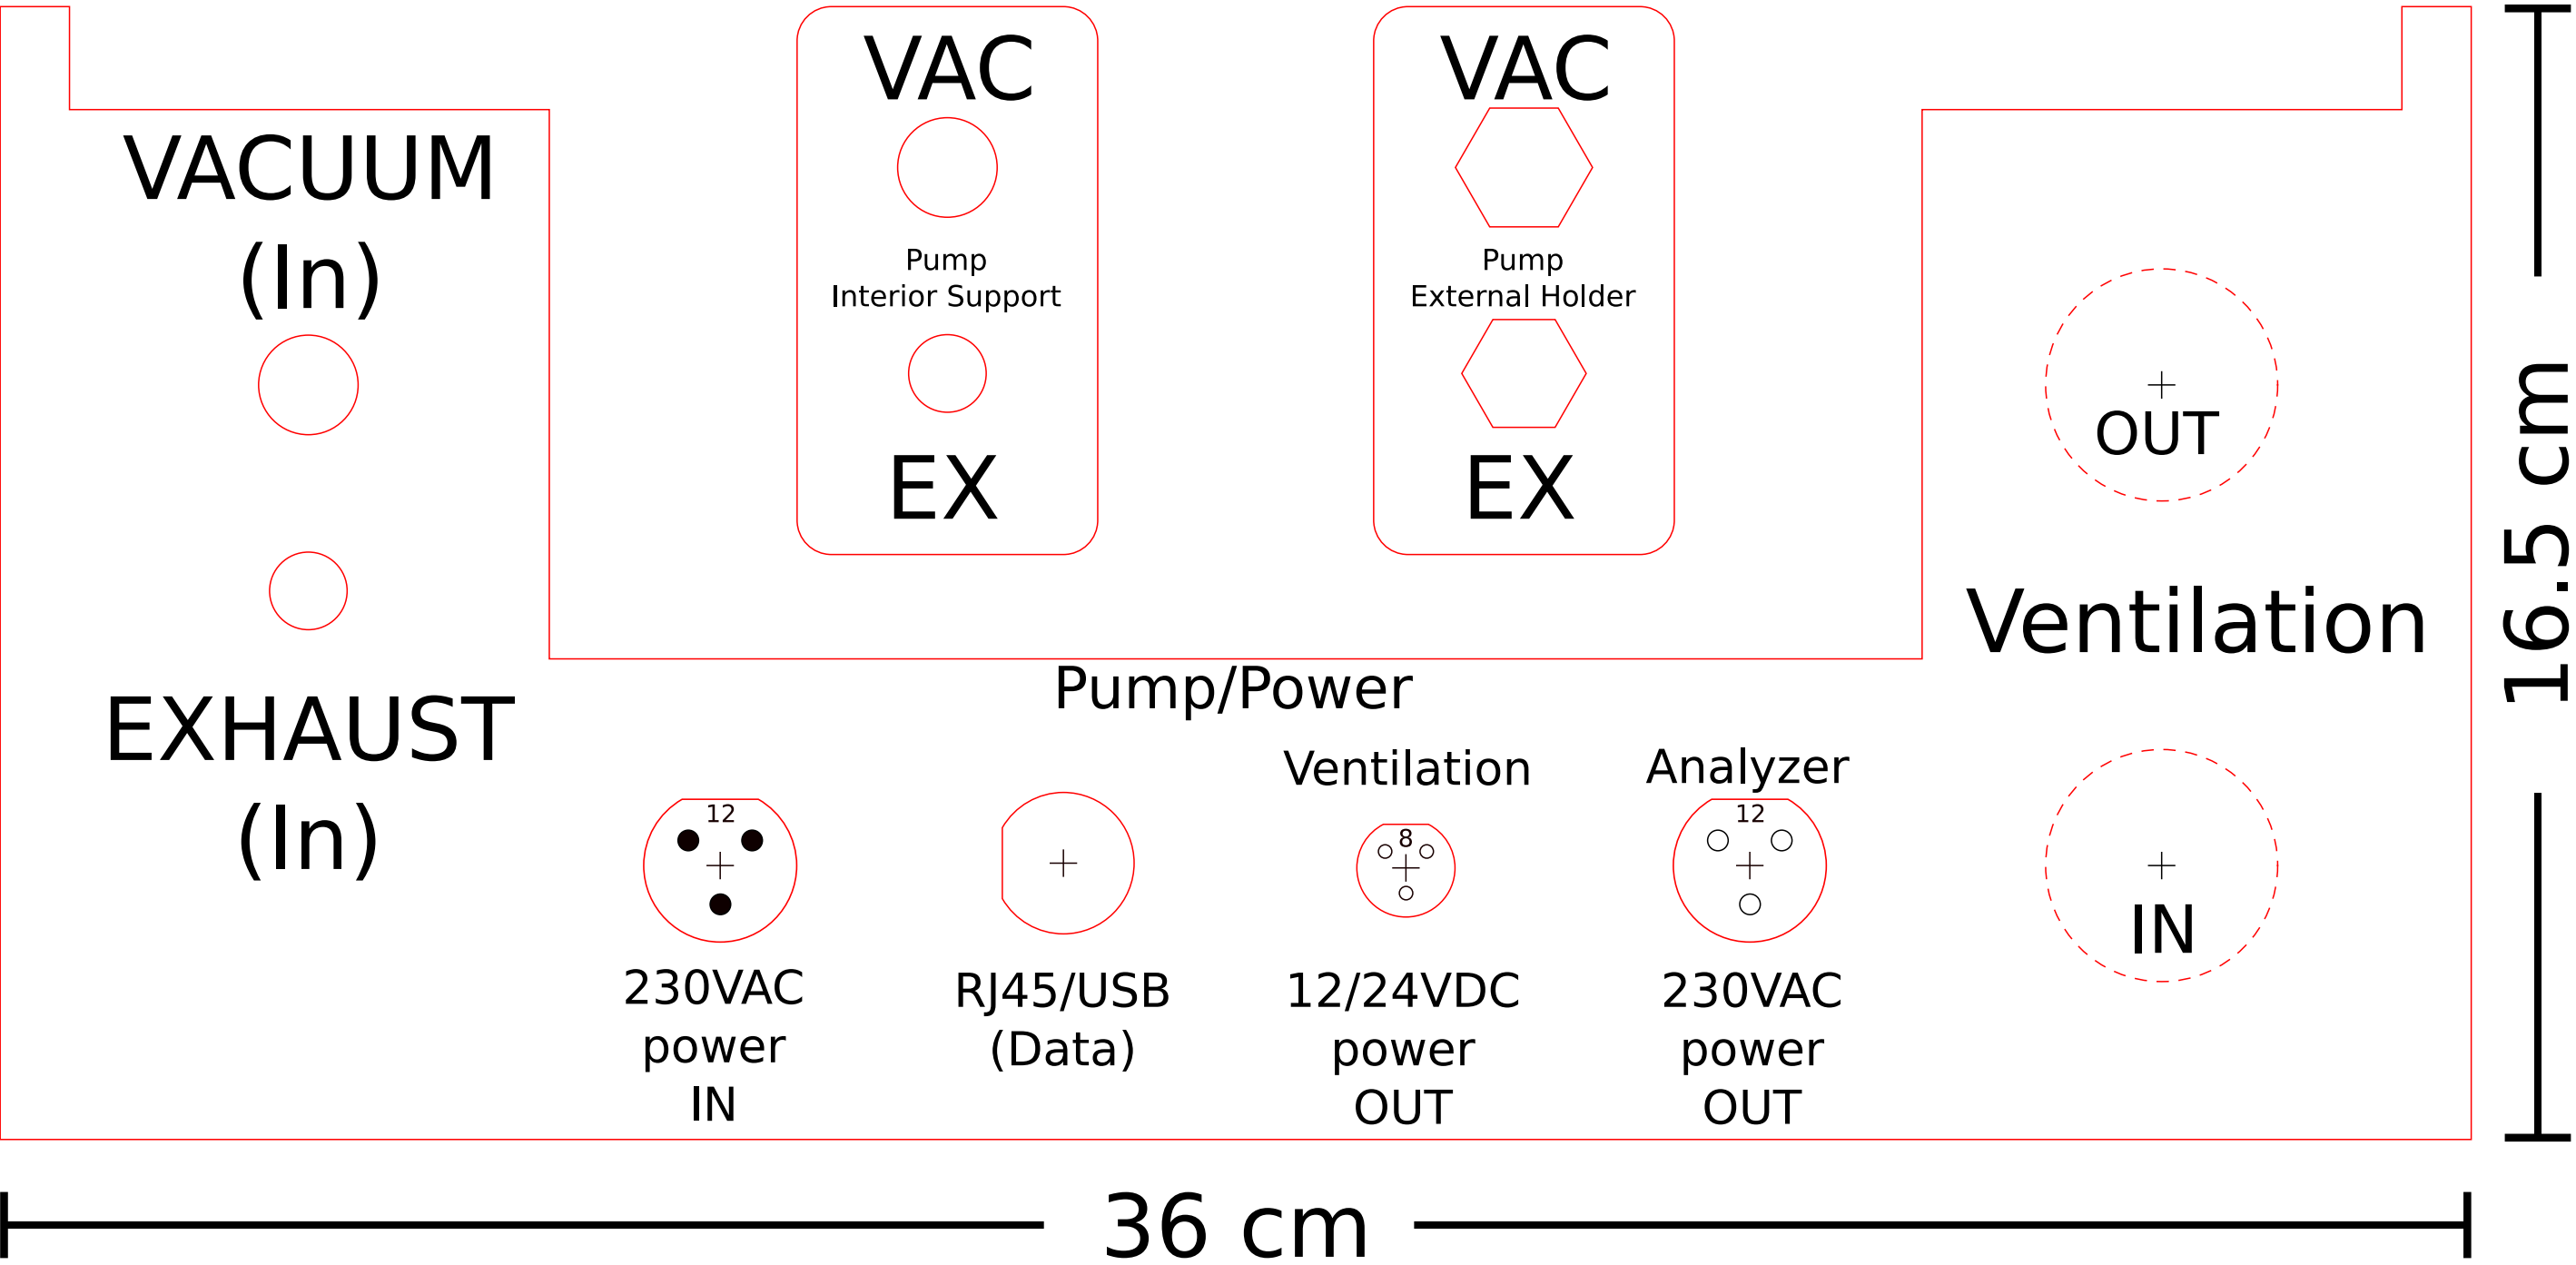

Supplement: Supplementary file 3 [file ISE_CUBEs-connectors_template.pdf › Templates_&_Dimensional_drawings/ISE_CUBEs-connectors_template.pdf]

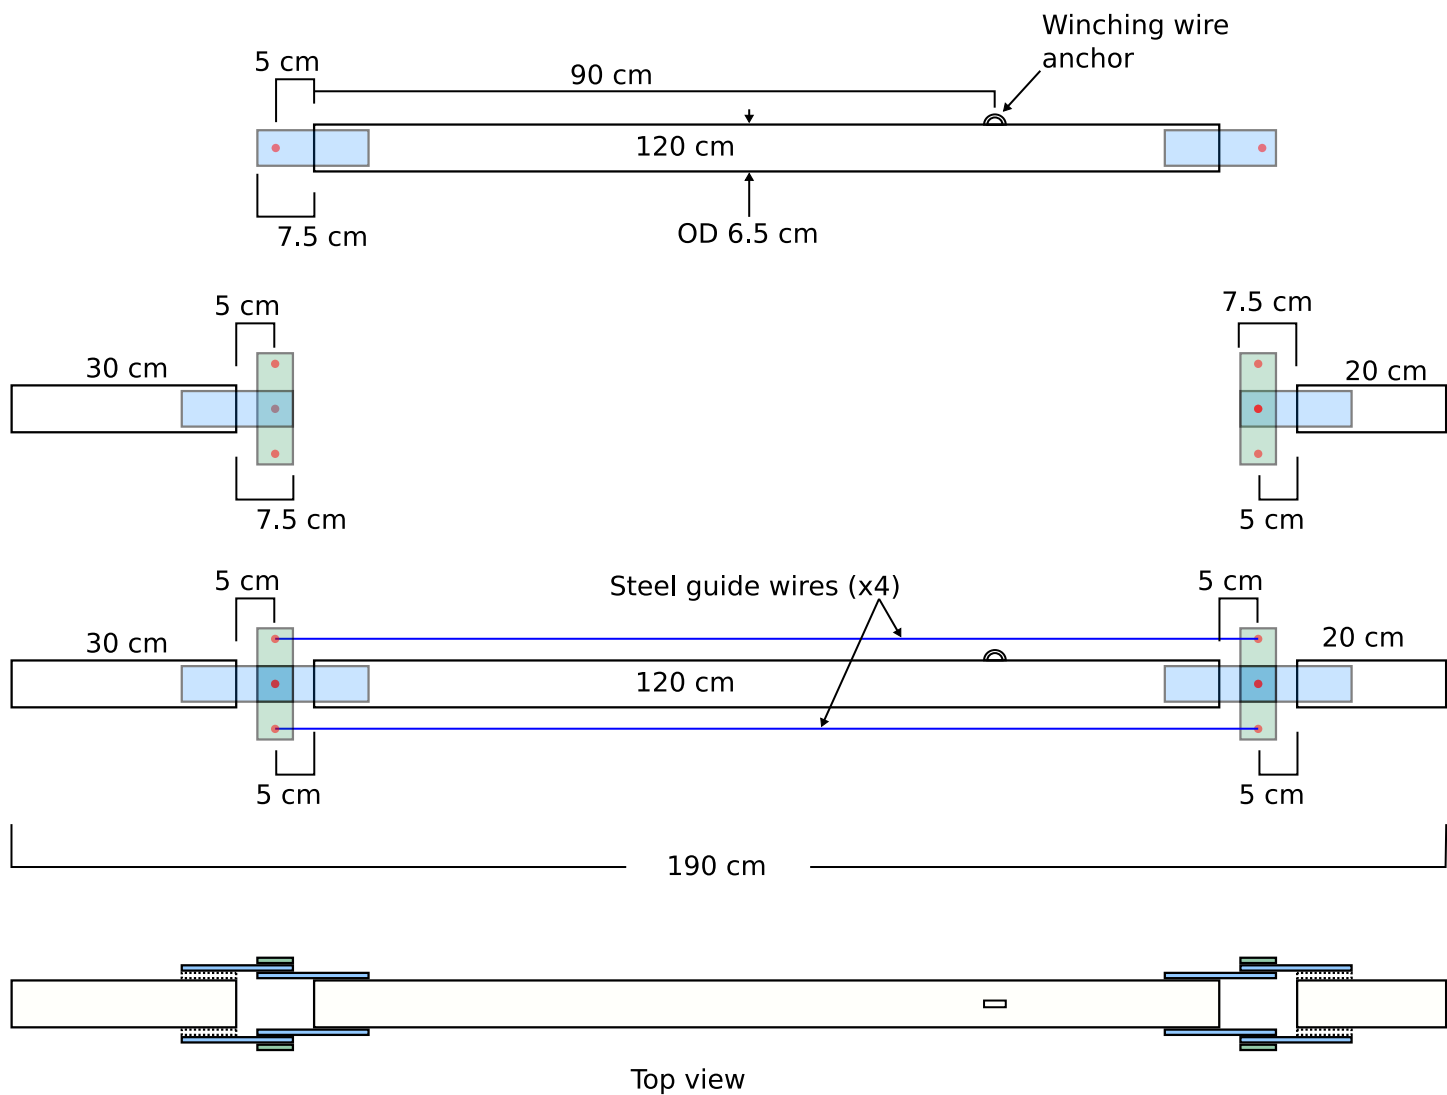

x4

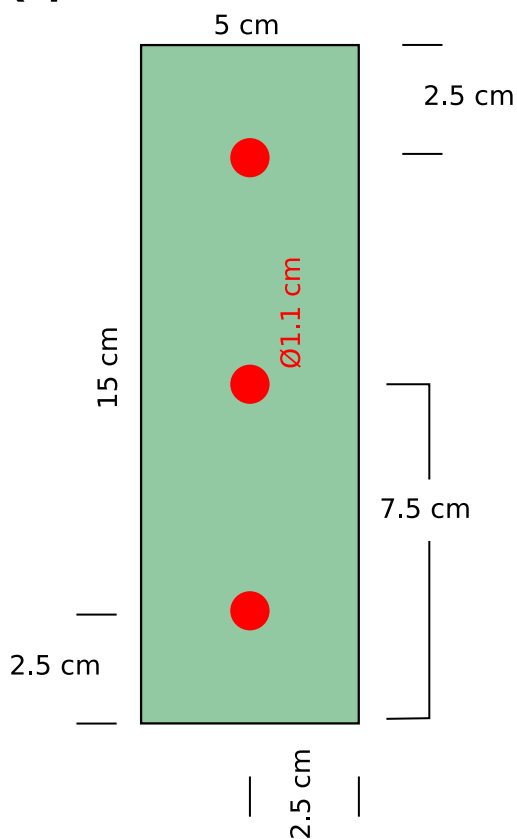

x8

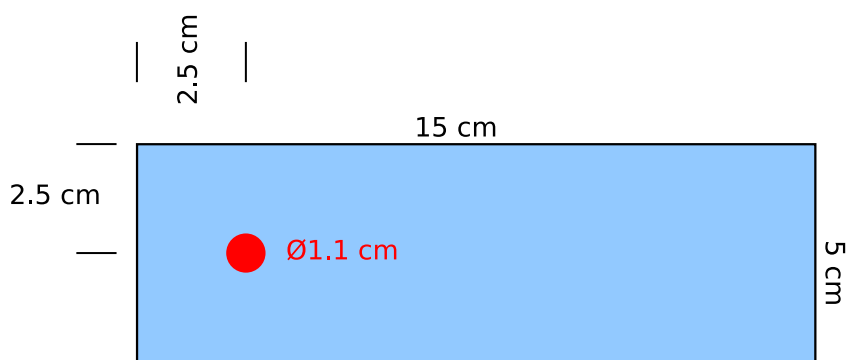

x4

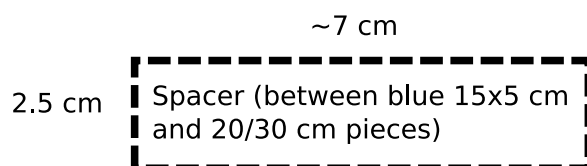

Supplement: Supplementary file 4 [file Profiling-arm_drawings.pdf › Templates_&_Dimensional_drawings/Profiling-arm_drawings.pdf]
